# Supplementary material for: Genomic and transcriptomic analysis of the thermophilic lignocellulose-degrading fungus Thielavia terrestris LPH172
Source: Research Square preprint supplement (doi:10.21203/rs.3.rs-96298/v1), 2020-10-26
Supplement: Supplementary file 1 [file b201e13de7b0a29827776c46.xlsx]

## Sheet: diffexp CAZymes
X...X...id	log2_Avi_vs_Glc	up on Avi	p_Avi_Glc	sig_Avi_Glc	log2_BX_vs_Glc	up on BX	p_BX_Glc	sig_BX_Glc	log2_CCX_vs_Glc	up on CCX	p_CCX_Glc	sig_CCX_Glc	log2_RS_vs_Glc	up on RS	p_RS_Glc	sig_RS_Glc	quiver	gene_name	cazy_domain_1	cazy_domain_2	cazy_domain_3	signalp	gi	pident	evalue	description
THTET00000006537	1.65303		5e-05	yes	-2.7915	6.92349	1	no	-1.44779	2.7279	1	no	-10.93	1951	0.0256	yes	unitig_6|quiver	manf	GH5_7			N	gi|294958177|sp|Q5AR04.2|MANF_EMENI	53.88	2.09e-156	RecName: Full=Probable mannan endo-1,4-beta-mannosidase F
THTET00000001839	-6.67422	102.127	5e-05	yes	-5.12818	34.9733	5e-05	yes	-6.9507	123.7	5e-05	yes	-10.6525	1609.62	5e-05	yes	unitig_0|quiver	xyna	GH11			Y	gi|2851624|sp|P55331.2|XYNA_ASPTU	76.471	4.49e-118	RecName: Full=Endo-1,4-beta-xylanase A
THTET00000006268	-5.99104	63.6038	0.0007	yes	-5.16433	35.8607	0.0003	yes	-1.65157	3.14175	1	no	-10.1474	1134.15	0.00325	yes	unitig_6|quiver	egld_10	AA9			Y	gi|74681380|sp|Q5BCX8.1|EGLD_EMENI	37.86	1.79e-25	RecName: Full=Endo-beta-1,4-glucanase D
THTET00000009005	-4.17313	18.04	0.01905	yes	-3.75715	13.5212	0.012	yes	-1.55247	2.93319	1	no	-9.1877	583.141	0.0369	no	unitig_90|quiver	axha-1	GH62			Y	gi|294956511|sp|Q5B9Z8.2|AXHA1_EMENI	70.695	5.14e-173	RecName: Full=Probable alpha-L-arabinofuranosidase axhA-1
THTET00000008370	-10.8085	1793.42	5e-05	yes	-2.35352	5.1107	5e-05	yes	-0.259666	1.1972	0.36855	no	-8.05236	265.462	5e-05	yes	unitig_87|quiver	egld_8	AA9			Y	gi|296439556|sp|B0Y9G4.1|EGLD_ASPFC	40.816	4.13e-27	RecName: Full=Probable endo-beta-1,4-glucanase D
THTET00000000910	-7.25148	152.375	5e-05	yes	-1.30166	2.46512	0.00275	yes	-2.04345	4.1223	5e-05	yes	-8.00007	256.012	5e-05	yes	unitig_0|quiver	arb_05157_3	CBM50			N	gi|961512610|sp|D4ALG0.1|LYSM1_ARTBC	30.227	6.43e-62	RecName: Full=LysM domain-containing protein ARB_05157
THTET00000009033	-2.40696	5.30356	5e-05	yes	-2.18542	4.54859	5e-05	yes	-0.790059	1.72915	0.12755	no	-7.64978	200.823	5e-05	yes	unitig_90|quiver	xyl2	GH10			Y	gi|667467209|sp|G4MTF8.1|XYN2_MAGO7	73.529	5.03e-170	RecName: Full=Endo-1,4-beta-xylanase 2
THTET00000003205	-3.25225	9.52851	0.09495	no	-2.70996	6.54304	0.2122	no	-7.6217	196.952	0.02345	no	-7.24663	151.863	0.0282	yes	unitig_1|quiver	xyn1	GH11			Y	gi|549460|sp|P36218.1|XYN1_HYPJR	48.511	2.54e-57	RecName: Full=Endo-1,4-beta-xylanase 1
THTET00000004352	-5.42068	42.8339	5e-05	yes	0.505259		0.6188	no	-2.54516	5.83673	0.00345	yes	-7.2245	149.552	5e-05	yes	unitig_2|quiver	egld_2	AA9			Y	gi|121735604|sp|Q0CEU4.1|EGLD_ASPTN	31.132	2.98e-11	RecName: Full=Probable endo-beta-1,4-glucanase D
THTET00000008797	1.3296		5e-05	yes	0.174345		0.5662	no	1.17201		0.0001	yes	-7.16376	143.386	5e-05	yes	unitig_88|quiver	cuta	CE5			Y	gi|117651|sp|P11373.1|CUTI1_COLGL	56.14	1.54e-77	RecName: Full=Cutinase 1
THTET00000001736	-12.1811	4643.83	5e-05	yes	-5.1558	35.6493	5e-05	yes	-6.37572	83.0392	5e-05	yes	-7.12689	139.768	5e-05	yes	unitig_0|quiver	egld_5	AA9			Y	gi|296439559|sp|A1DBS6.1|EGLD_NEOFI	31.373	5.93e-36	RecName: Full=Probable endo-beta-1,4-glucanase D
THTET00000002489	-3.93437	15.2884	5e-05	yes	-0.899066	1.86486	0.04465	no	-6.06216	66.8178	5e-05	yes	-6.71004	104.694	5e-05	yes	unitig_1|quiver	xlnb	GH11			Y	gi|146291103|sp|P55333.2|XYNB_EMENI	51.948	2.56e-68	RecName: Full=Endo-1,4-beta-xylanase B
THTET00000005762	-4.7227	26.4043	5e-05	yes	-6.06528	66.9624	5e-05	yes	-8.20204	294.483	5e-05	yes	-5.7873	55.2269	5e-05	yes	unitig_4|quiver	axe-2	CE5			Y	gi|74626767|sp|O59893.1|AXE2_PENPU	57.203	6.22e-88	RecName: Full=Acetylxylan esterase 2
THTET00000006012	-7.20375	147.416	5e-05	yes	-0.459816	1.37537	0.0781	no	0.190389		0.4285	no	-5.69005	51.6269	5e-05	yes	unitig_6|quiver	aes1	CE16			Y	gi|1008808671|sp|G2QJ27.1|AES1_MYCTT	76.384	1.19e-153	RecName: Full=Acetylesterase
THTET00000007104	-1.62254	3.07917	1	no	-1.59527	3.02151	1	no	1.26682		1	no	-5.17249	36.0641	0.0154	yes	unitig_11|quiver	rhgb_2	GH28			Y	gi|296439762|sp|A1DED1.1|RHGB_NEOFI	39.103	2.22e-93	RecName: Full=Probable rhamnogalacturonase B
THTET00000007455	-6.38487	83.5675	5e-05	yes	1.65445		5e-05	yes	-1.29781	2.45855	5e-05	yes	-4.62858	24.7367	5e-05	yes	unitig_13|quiver	cel61a_4	AA9			N	gi|408407604|sp|G2Q9T3.1|CEL61_THIHA	36.694	4.56e-22	RecName: Full=Polysaccharide monooxygenase Cel61a
THTET00000007042	-0.955025	1.93861	5e-05	yes	-4.48116	22.3338	5e-05	yes	2.61064		5e-05	yes	-4.45744	21.9697	5e-05	yes	unitig_11|quiver	gel1	GH72			Y	gi|193806026|sp|B0XT72.1|GEL1_ASPFC	58.252	4.2e-164	RecName: Full=1,3-beta-glucanosyltransferase gel1
THTET00000009190	-0.380885	1.30214	0.6164	no	1.99712		0.29955	no	0.0478543		0.9639	no	-4.25969	19.1555	5e-05	yes	unitig_90|quiver	qutd_6	AA8			N	gi|300681093|sp|A2QQV6.1|QUTD_ASPNC	32.028	1.22e-56	RecName: Full=Probable quinate permease
THTET00000001081	-3.99405	15.9341	5e-05	yes	-0.0906973	1.06488	0.68125	no	-0.013223	1.00921	0.9405	no	-3.95301	15.4873	5e-05	yes	unitig_0|quiver	nbis_	GH131			Y	gi|121784555|sp|Q2H332.1|HOG1_CHAGB	25.352	0.97	RecName: Full=Mitogen-activated protein kinase HOG1
THTET00000003075	-7.23617	150.766	5e-05	yes	-3.36245	10.2849	5e-05	yes	-3.30951	9.91429	5e-05	yes	-3.93192	15.2625	5e-05	yes	unitig_1|quiver	xynb	GH11	CBM1		Y	gi|74629676|sp|Q8J0K5.1|XYNB_PENFN	52.74	3.19e-85	RecName: Full=Endo-1,4-beta-xylanase B
THTET00000005138	-3.61176	12.225	5e-05	yes	0.67326		1	no	0.407368		1	no	-3.91032	15.0357	1	no	unitig_3|quiver	beta	AA3_2			Y	gi|74656895|sp|Q5AUN2.1|XPTC_EMENI	34.446	1.58e-104	RecName: Full=Dehydrogenase xptC
THTET00000000912	-2.89687	7.44809	5e-05	yes	0.682477		0.00205	yes	0.00248844		0.98865	no	-3.65019	12.555	5e-05	yes	unitig_0|quiver	ktxa_5	GH18	CBM18	CBM50	N	gi|125727|sp|P09805.1|KTXA_KLULA	40.293	9.59e-115	RecName: Full=Killer toxin subunits alpha/beta
THTET00000003770	-0.174584	1.12864	0.5571	no	-0.261286	1.19855	0.5274	no	-0.247572	1.18721	0.4532	no	-3.57496	11.9171	5e-05	yes	unitig_1|quiver	egld_11	AA9			N	gi|121805834|sp|Q2US83.1|EGLD_ASPOR	40.086	2.41e-46	RecName: Full=Probable endo-beta-1,4-glucanase D
THTET00000007900	-0.297501	1.22901	0.1207	no	-1.00877	2.01219	5e-05	yes	-0.729464	1.65802	0.00105	yes	-3.39398	10.5121	5e-05	yes	unitig_87|quiver	alg10	GT59			N	gi|81170362|sp|Q4HZE0.1|ALG10_GIBZE	43.02	3.88e-166	RecName: Full=Dol-P-Glc:Glc(2)Man(9)GlcNAc(2)-PP-Dol alpha-1,2-glucosyltransferase
THTET00000006681	-4.28585	19.5061	5e-05	yes	-0.391604	1.31185	0.1764	no	-1.52024	2.86839	5e-05	yes	-3.28948	9.7776	5e-05	yes	unitig_7|quiver	fox3	AA7			Y	gi|75211540|sp|Q9SVG5.1|BBE18_ARATH	27.571	7.29e-36	RecName: Full=Berberine bridge enzyme-like 18
THTET00000005685	-0.668778	1.58973	0.0014	yes	-4.81034	28.058	5e-05	yes	-2.36608	5.15538	5e-05	yes	-3.23506	9.41565	5e-05	yes	unitig_4|quiver	chit1	GH18			N	gi|667467001|sp|E9ERT9.1|CHI1_METRA	66.165	0	RecName: Full=Endochitinase 1
THTET00000007992	-1.01869	2.02608	0.01565	yes	-1.29779	2.45852	0.0133	yes	-0.0355741	1.02496	0.9396	no	-3.22672	9.36137	5e-05	yes	unitig_87|quiver	mnt1	GT15			N	gi|2494840|sp|Q00310.1|MNT1_CANAL	53.972	1.08e-164	RecName: Full=Glycolipid 2-alpha-mannosyltransferase 1
THTET00000006499	-9.03587	524.89	5e-05	yes	0.076137		0.7644	no	-1.61755	3.06853	5e-05	yes	-3.19202	9.1389	5e-05	yes	unitig_6|quiver	faeb_2	CBM1			Y	gi|25090320|sp|Q9HE18.1|FAEB_PENFN	86.486	2.15e-14	RecName: Full=Feruloyl esterase B
THTET00000008944	-2.63245	6.20078	5e-05	yes	-0.775235	1.71147	0.08785	no	-2.63617	6.21679	5e-05	yes	-3.12219	8.70709	5e-05	yes	unitig_90|quiver	gnt1_2	GT8			N	gi|1063797048|sp|Q4HVS2.2|GNT1_GIBZE	62.829	3.09e-134	RecName: Full=Glucose N-acetyltransferase 1
THTET00000002710	-1.67766	3.19909	0.068	no	-4.44868	21.8367	0.00345	yes	-2.13403	4.38942	0.04485	no	-3.0044	8.02444	0.0096	yes	unitig_1|quiver	opgh	GT0			N	gi|226738987|sp|B0RNI5.1|OPGH_XANCB	28.571	1.31e-07	RecName: Full=Glucans biosynthesis glucosyltransferase H
THTET00000009640	-4.23234	18.7958	0.00035	yes	0.507013		0.68165	no	-0.749755	1.68151	0.4693	no	-2.99864	7.99246	0.007	yes	unitig_92|quiver	manc	GH5_7			Y	gi|121733403|sp|Q0C8J3.1|MANC_ASPTN	71.007	0	RecName: Full=Probable mannan endo-1,4-beta-mannosidase C
THTET00000007088	-3.59656	12.0969	5e-05	yes	-4.38758	20.9312	5e-05	yes	-3.94761	15.4294	5e-05	yes	-2.97539	7.86469	5e-05	yes	unitig_11|quiver	ugt84a2	GT1			N	gi|1239396283|sp|A0A1B4XBH6.1|SDNJ_SORAA	29.391	4.97e-63	RecName: Full=Glycosyltransferase sdnJ
THTET00000004380	-9.52473	736.596	5e-05	yes	-1.21254	2.31745	0.09795	no	-1.49103	2.8109	0.0128	yes	-2.84629	7.19149	5e-05	yes	unitig_2|quiver	cdh-1_6	AA3_1	AA8		Y	gi|6831496|sp|Q01738.1|CDH_PHACH	39.547	3.62e-155	RecName: Full=Cellobiose dehydrogenase
THTET00000004691	-0.0107296	1.00746	0.94525	no	-1.22927	2.34448	5e-05	yes	-0.315536	1.24447	0.0604	no	-2.84628	7.19144	5e-05	yes	unitig_2|quiver	mnt3	GT71			N	gi|731782|sp|P40549.1|MNT3_YEAST	26.683	3.62e-18	RecName: Full=Alpha-1,3-mannosyltransferase MNT3
THTET00000000225	-8.73411	425.823	5e-05	yes	-0.956995	1.94126	0.12865	no	-0.575754	1.49046	0.169	no	-2.84607	7.19039	5e-05	yes	unitig_0|quiver	vaoa_3	AA4			N	gi|3024813|sp|P56216.1|VAOX_PENSI	32.079	1.75e-92	RecName: Full=Vanillyl-alcohol oxidase
THTET00000004155	0.731146		0.2499	no	-0.889104	1.85203	0.01625	yes	0.490965		0.24945	no	-2.76224	6.78449	5e-05	yes	unitig_2|quiver	alg8	GT57			N	gi|121788395|sp|Q2HA14.1|ALG8_CHAGB	85.828	0	RecName: Full=Dolichyl pyrophosphate Glc1Man9GlcNAc2 alpha-1,3-glucosyltransferase
THTET00000002806	-0.0274505	1.01921	0.9207	no	-0.912294	1.88204	0.00845	yes	-0.323648	1.25149	0.27955	no	-2.70531	6.52198	5e-05	yes	unitig_1|quiver	spac6g10.09_2	GH63			Y	gi|3913731|sp|O14255.1|GCS1_SCHPO	44.473	0	RecName: Full=Probable mannosyl-oligosaccharide glucosidase
THTET00000001441	-0.5689	1.48339	0.0044	yes	-0.760906	1.69455	0.01185	yes	-0.131852	1.0957	0.67495	no	-2.68389	6.42586	5e-05	yes	unitig_0|quiver	amy1	GH13_1	CBM20		Y	gi|94706935|sp|P0C1B3.1|AMYA1_ASPOR	57.384	0	RecName: Full=Alpha-amylase A type-1/2
THTET00000006031	-3.81395	14.0641	5e-05	yes	-3.50215	11.3306	5e-05	yes	-0.296951	1.22855	0.1237	no	-2.63728	6.22158	5e-05	yes	unitig_6|quiver	rhga	GH28			Y	gi|2499718|sp|Q00001.1|RHGA_ASPAC	58.087	9.04e-178	RecName: Full=Rhamnogalacturonase A
THTET00000007514	-2.15905	4.46621	5e-05	yes	0.502281		0.07955	no	-1.59646	3.024	5e-05	yes	-2.60209	6.07166	5e-05	yes	unitig_13|quiver	ssud	AA3			N	gi|226734296|sp|B2VC88.1|SSUD_ERWT9	33.333	1.2e-44	RecName: Full=Alkanesulfonate monooxygenase
THTET00000009589	-1.1808	2.26702	5e-05	yes	-0.255338	1.19362	0.30025	no	-0.547972	1.46203	0.00735	yes	-2.57021	5.93896	5e-05	yes	unitig_92|quiver	agl1	GH27			N	gi|74626990|sp|O94221.1|AGALB_PENSI	39.759	5.3e-90	RecName: Full=Probable alpha-galactosidase B
THTET00000007814	-2.96014	7.78199	5e-05	yes	0.0941179		0.7027	no	-2.50979	5.69537	5e-05	yes	-2.4267	5.37662	5e-05	yes	unitig_87|quiver	aes1_2	CE16			N	gi|1008808670|sp|A7J2C6.1|AES1_HYPJE	51.594	9.26e-126	RecName: Full=Acetylesterase
THTET00000002666	-2.69645	6.48205	0.00095	yes	-2.46274	5.51263	0.00965	yes	-0.149948	1.10953	0.8543	no	-2.39822	5.27152	0.0043	yes	unitig_1|quiver	sdh_4	AA3			N	gi|75499879|sp|Q47944.1|SDH_GLUOY	30.426	1.54e-54	RecName: Full=L-sorbose 1-dehydrogenase
THTET00000001395	-0.800846	1.74212	0.0468	no	-0.935884	1.91306	0.0724	no	-0.747565	1.67896	0.0873	no	-2.39479	5.25901	5e-05	yes	unitig_0|quiver	mnn10	GT34			N	gi|1709062|sp|P50108.1|MNN10_YEAST	52.145	3.92e-108	RecName: Full=Probable alpha-1,6-mannosyltransferase MNN10
THTET00000005534	-0.523409	1.43735	0.0141	yes	0.228571		0.386	no	-0.0135886	1.00946	0.95225	no	-2.30973	4.9579	5e-05	yes	unitig_4|quiver	cel12a	GH12			N	gi|803374843|sp|G4NAZ1.1|CE12A_MAGO7	51.429	1.21e-74	RecName: Full=Endoglucanase cel12A
THTET00000008166	-5.75618	54.0484	5e-05	yes	-4.39166	20.9904	5e-05	yes	-1.25622	2.38869	5e-05	yes	-2.26434	4.80435	5e-05	yes	unitig_87|quiver	axe1	CE5	CBM1		Y	gi|41016921|sp|Q99034.1|AXE1_HYPJE	60	1.32e-112	RecName: Full=Acetylxylan esterase
THTET00000002166	-1.55504	2.93842	5e-05	yes	-3.60948	12.2057	5e-05	yes	-0.605584	1.52159	0.00035	yes	-2.21971	4.658	5e-05	yes	unitig_0|quiver	mns2	GH47			N	gi|75151865|sp|Q8H116.1|MNS2_ARATH	34.19	9.25e-71	RecName: Full=Mannosyl-oligosaccharide 1,2-alpha-mannosidase MNS2
THTET00000009038	-1.3799	2.6025	5e-05	yes	-0.294338	1.22632	0.2978	no	-1.27018	2.41192	5e-05	yes	-2.21778	4.65177	5e-05	yes	unitig_90|quiver	colgalt1_2	GT25			Y	gi|160395521|sp|A5PMF6.1|GT251_DANRE	30	7.09e-09	RecName: Full=Procollagen galactosyltransferase 1
THTET00000005469	-0.383508	1.30451	0.23765	no	-0.804236	1.74622	0.02615	no	-1.55876	2.94601	5e-05	yes	-2.20632	4.61497	5e-05	yes	unitig_4|quiver	nbis_	GH39			N	gi|6226300|sp|Q9ZFM2.1|XYNB_GEOSE	26.316	0.022	RecName: Full=Beta-xylosidase
THTET00000002394	0.218079		0.6164	no	-2.18787	4.55632	5e-05	yes	-0.527567	1.4415	0.22675	no	-2.16293	4.47823	5e-05	yes	unitig_0|quiver	nbis_	GH131			N	NA	NA	NA	NA
THTET00000002583	0.210902		0.15375	no	-0.464065	1.37942	0.0168	yes	-0.188936	1.13992	0.24385	no	-1.95568	3.87899	5e-05	yes	unitig_1|quiver	anp1_2	GT62			N	gi|31077045|sp|O74745.1|ANP1_SCHPO	50.323	4.31e-97	RecName: Full=Mannan polymerase II complex anp1 subunit
THTET00000004350	-8.8714	468.336	5e-05	yes	-0.83068	1.77852	0.2358	no	-5.07536	33.716	5e-05	yes	-1.91874	3.78093	0.0013	yes	unitig_2|quiver	egld_4	AA9	CBM1		Y	gi|296439559|sp|A1DBS6.1|EGLD_NEOFI	35.294	4.2e-53	RecName: Full=Probable endo-beta-1,4-glucanase D
THTET00000005797	-8.22047	298.269	5e-05	yes	3.12122		5e-05	yes	0.416189		0.0379	no	-1.91052	3.75945	5e-05	yes	unitig_5|quiver	eg7a	GH7	CBM1		Y	gi|817033842|sp|G2QCS4.1|CEL7A_THIHA	74.784	0	RecName: Full=Endoglucanase 7a
THTET00000006655	-6.96817	125.207	5e-05	yes	-0.788549	1.72734	5e-05	yes	-0.384973	1.30584	0.01915	no	-1.90329	3.74065	5e-05	yes	unitig_7|quiver	cel6a	GH6			Y	gi|803374849|sp|B2ABX7.1|CEL6A_PODAN	73.77	0	RecName: Full=1,4-beta-D-glucan cellobiohydrolase CEL6A
THTET00000005929	-0.909399	1.87826	5e-05	yes	-0.728639	1.65708	0.0053	yes	0.106784		0.5905	no	-1.84696	3.59741	5e-05	yes	unitig_6|quiver	nbis_	GT31			N	gi|27734415|sp|P79948.1|LFNG_XENLA	24.607	0.11	RecName: Full=Beta-1,3-N-acetylglucosaminyltransferase lunatic fringe
THTET00000008161	-4.92298	30.3364	5e-05	yes	-2.40423	5.29353	5e-05	yes	-0.0378199	1.02656	0.8751	no	-1.78307	3.44158	5e-05	yes	unitig_87|quiver	xyn1_2	GH10	CBM1		Y	gi|74654923|sp|P79046.1|XYN1_HUMGT	68.627	0	RecName: Full=Endo-1,4-beta-xylanase 1
THTET00000002335	-0.671998	1.59328	0.0481	no	-0.687352	1.61033	0.0601	no	0.274776		0.50365	no	-1.74646	3.35534	5e-05	yes	unitig_0|quiver	rglb	PL4_3			Y	gi|296439827|sp|Q5AZ85.2|RGLB_EMENI	57.784	0	RecName: Full=Rhamnogalacturonate lyase B
THTET00000000524	-0.216568	1.16197	0.25795	no	0.128774		0.6318	no	0.396255		0.0727	no	-1.72883	3.31459	5e-05	yes	unitig_0|quiver	chib1	GH18			N	gi|74663646|sp|Q873X9.1|CHIB1_ASPFM	32.454	3.85e-48	RecName: Full=Endochitinase B1
THTET00000004717	1.0696		0.0022	yes	-3.39943	10.5519	5e-05	yes	-0.938097	1.916	0.00305	yes	-1.69639	3.24089	5e-05	yes	unitig_2|quiver	ktxa_4	GH18	CBM18		Y	gi|125727|sp|P09805.1|KTXA_KLULA	33.247	8.91e-49	RecName: Full=Killer toxin subunits alpha/beta
THTET00000005546	0		1	no	0.586075		0.07195	no	-0.611279	1.52761	0.0121	yes	-1.59631	3.02369	5e-05	yes	unitig_4|quiver	cbh-1_2	GH7	CBM1		Y	gi|1346226|sp|P15828.2|GUX1_HUMGT	72.137	0	RecName: Full=Exoglucanase 1
THTET00000006264	0.258946		0.3167	no	-0.277862	1.2124	0.4328	no	0.661937		0.0125	yes	-1.47756	2.78477	5e-05	yes	unitig_6|quiver	pgxb	GH28			Y	gi|294958190|sp|A1DAX2.1|PGXB_NEOFI	63.982	0	RecName: Full=Probable exopolygalacturonase B
THTET00000006871	0.396611		0.245	no	0.46238		0.28075	no	-0.290458	1.22303	0.41375	no	-1.47384	2.7776	0.0001	yes	unitig_11|quiver	mug157	GH125			N	gi|1723558|sp|Q10449.1|MU157_SCHPO	54.403	0	RecName: Full=Meiotically up-regulated gene 157 protein
THTET00000001019	-5.65222	50.2907	5e-05	yes	-2.1823	4.53877	5e-05	yes	0.409599		0.12055	no	-1.41942	2.67478	5e-05	yes	unitig_0|quiver	cmc3	GH5_5			Y	gi|13959390|sp|Q12624.1|GUN3_HUMIN	71.538	0	RecName: Full=Endoglucanase 3
THTET00000002354	-2.33836	5.05727	0.0001	yes	-1.23243	2.34962	0.03395	no	-0.137271	1.09982	0.81375	no	-1.37692	2.59713	0.0125	yes	unitig_0|quiver	egld_3	AA9			N	gi|74667001|sp|Q4WBU0.1|EGLD_ASPFU	35.813	2.55e-52	RecName: Full=Probable endo-beta-1,4-glucanase D
THTET00000008907	-0.23241	1.1748	0.1856	no	-2.2571	4.7803	5e-05	yes	-4.4562	21.9508	5e-05	yes	-1.37464	2.59303	5e-05	yes	unitig_90|quiver	bgla_4	GH16			Y	gi|1170129|sp|P45798.1|GUB_RHOMR	28.956	1.67e-24	RecName: Full=Beta-glucanase
THTET00000008676	-0.319207	1.24764	0.39585	no	-0.649493	1.56862	0.1677	no	-0.297996	1.22944	0.5054	no	-1.22378	2.33558	0.01685	yes	unitig_88|quiver	mal2	GH13_40			N	gi|1170870|sp|Q02751.4|MALT_CANAX	50.767	0	RecName: Full=Alpha-glucosidase
THTET00000006028	-0.894742	1.85928	5e-05	yes	-0.883566	1.84493	0.001	yes	-0.6482	1.56721	0.0042	yes	-1.19898	2.29577	5e-05	yes	unitig_6|quiver	treph	GT4			N	gi|74582623|sp|O75003.1|TREPH_GRIFR	48.356	0	RecName: Full=Trehalose phosphorylase
THTET00000001663	-0.186696	1.13815	0.6558	no	0.117676		0.82545	no	-0.414582	1.33291	0.32765	no	-1.08872	2.12685	0.02165	yes	unitig_0|quiver	lcc2_3	AA1_3			N	gi|1338317953|sp|A0A067XMP2.2|PTAK_PESFW	47.464	8.88e-176	RecName: Full=Oxydoreductase ptaK
THTET00000005809	-2.96488	7.8076	5e-05	yes	-0.561669	1.47598	0.19045	no	-3.19388	9.15069	5e-05	yes	-1.06401	2.09073	0.0118	yes	unitig_5|quiver	vbs	AA3_2			Y	gi|1064302944|sp|A1CFL2.1|PATE_ASPCL	42.244	3.01e-143	RecName: Full=Dehydrogenase patE
THTET00000007512	1.60459		0.0017	yes	1.08944		0.14165	no	0.168497		0.7162	no	-1.01487	2.02072	0.0166	yes	unitig_13|quiver	aod1	AA3_3			N	gi|231528|sp|Q00922.1|ALOX_CANBO	36.705	5.91e-128	RecName: Full=Alcohol oxidase
THTET00000007022	0.764273		0.04895	no	0.563096		0.20355	no	0.107364		0.7332	no	-0.89475	1.85929	0.00285	yes	unitig_11|quiver	arb_35	GT33			N	gi|939319561|sp|D4AZD1.1|ALG1_ARTBC	50.773	1.36e-116	RecName: Full=Chitobiosyldiphosphodolichol beta-mannosyltransferase
THTET00000004861	0.162338		0.72815	no	0.342311		0.559	no	0.514442		0.1999	no	-0.852625	1.80578	0.0128	yes	unitig_3|quiver	cbh-1	GH7			Y	gi|3913803|sp|Q00548.1|GUX1_CRYPA	69.824	0	RecName: Full=Exoglucanase 1
THTET00000002396	-1.8533	3.61326	5e-05	yes	-1.87873	3.67751	0.00015	yes	0.28488		1	no	-0.79618	1.7365	1	no	unitig_0|quiver	exg1_6	GH55			Y	gi|1352399|sp|P49426.1|EXG1_COCCA	41.739	0	RecName: Full=Glucan 1,3-beta-glucosidase
THTET00000007635	0.440579		0.17655	no	-0.65646	1.57621	0.1051	no	-2.28367	4.86915	5e-05	yes	-0.689979	1.61326	0.03015	yes	unitig_87|quiver	chs-2	GT2			N	gi|597439646|sp|P30589.4|CHS2_NEUCR	71.226	0	RecName: Full=Chitin synthase 2
THTET00000005879	-1.69118	3.22921	5e-05	yes	-1.52744	2.88274	5e-05	yes	-0.155439	1.11376	0.38015	no	-0.684582	1.60724	5e-05	yes	unitig_6|quiver	eglb	GH5_5			Y	gi|296439554|sp|A1DME8.1|EGLB_NEOFI	61.165	1.77e-140	RecName: Full=Probable endo-beta-1,4-glucanase B
THTET00000005828	-0.355461	1.27939	0.0372	no	1.1578		5e-05	yes	0.897926		5e-05	yes	-0.626421	1.54373	0.0004	yes	unitig_6|quiver	yici	GH31			N	gi|2851420|sp|P31434.2|XYLS_ECOLI	50.213	0	RecName: Full=Alpha-xylosidase
THTET00000005010	0.384299		0.00705	yes	-2.43256	5.39851	5e-05	yes	-1.85185	3.60963	5e-05	yes	-0.50353	1.41768	0.0012	yes	unitig_3|quiver	lys	GH25			Y	gi|126597|sp|P00721.1|LYS_CHASP	75.829	4.25e-113	RecName: Full=N,O-diacetylmuramidase
THTET00000001148	-0.65657	1.57633	5e-05	yes	-0.54086	1.45484	0.00715	yes	0.521122		0.00185	yes	-0.480455	1.39518	0.00335	yes	unitig_0|quiver	alg12	GT22			N	gi|544584724|sp|Q8VDB2.2|ALG12_MOUSE	36.83	2.03e-64	RecName: Full=Dol-P-Man:Man(7)GlcNAc(2)-PP-Dol alpha-1,6-mannosyltransferase
THTET00000003321	0.854132		5e-05	yes	0.657578		0.00115	yes	0.0819332		0.6095	no	-0.471704	1.38675	0.0031	yes	unitig_1|quiver	gsy-1	GT3			N	gi|12230121|sp|O93869.2|GYS_NEUCR	92.197	0	RecName: Full=Glycogen [starch] synthase
THTET00000008320	-1.17342	2.25546	5e-05	yes	-0.302421	1.23321	0.33565	no	0.725603		0.0392	no	-0.461878	1.37733	0.08685	no	unitig_87|quiver	gls93	GH2			Y	gi|74705267|sp|Q4R1C4.1|EBDG_HYPJE	50.624	0	RecName: Full=Exo-beta-D-glucosaminidase
THTET00000004647	-0.277847	1.21238	0.0863	no	-0.738734	1.66871	0.0005	yes	-0.589101	1.50431	0.00055	yes	-0.443543	1.35994	0.00725	yes	unitig_2|quiver	colgalt1-b	GT25			N	gi|82179978|sp|Q5U483.1|G251B_XENLA	30.081	6.33e-08	RecName: Full=Procollagen galactosyltransferase 1-B
THTET00000001417	-0.303386	1.23404	0.0344	no	-0.808068	1.75087	5e-05	yes	0.220716		0.1596	no	-0.439139	1.35579	0.0045	yes	unitig_0|quiver	pmt4	GT39			N	gi|1160421871|sp|Q59X23.2|PMT4_CANAL	47.704	0	RecName: Full=Dolichyl-phosphate-mannose--protein mannosyltransferase 4
THTET00000003076	-0.394487	1.31448	0.25065	no	0.485253		0.229	no	-1.20767	2.30964	0.00155	yes	-0.348446	1.27319	0.31935	no	unitig_1|quiver	abfb	GH54	CBM42		Y	gi|74670267|sp|Q4WL66.1|ABFB_ASPFU	66.481	0	RecName: Full=Probable alpha-L-arabinofuranosidase B
THTET00000009000	-5.22634	37.4356	5e-05	yes	1.69942		0.109	no	-0.877201	1.83681	0.0171	no	-0.220723	1.16532	0.6653	no	unitig_90|quiver	gun5	GH45			Y	gi|1170135|sp|P43316.1|GUN5_HUMIN	74.057	1e-116	RecName: Full=Endoglucanase-5
THTET00000008101	-0.890521	1.85385	0.00085	yes	-0.876849	1.83636	0.01	yes	-0.0722861	1.05138	0.80335	no	-0.219521	1.16435	0.5886	no	unitig_87|quiver	cmt1	GT69			N	gi|52782778|sp|Q6U1Z4.1|CMT1_CRYNJ	24.373	3.11e-09	RecName: Full=Alpha-1,3-mannosyltransferase CMT1
THTET00000002313	-5.04102	32.9229	5e-05	yes	0.122537		0.67415	no	-0.993233	1.99064	0.00045	yes	-0.200912	1.14942	0.4138	no	unitig_0|quiver	bacova	GH43_36			N	gi|597501037|sp|A7LXU0.2|GH43B_BACO1	28.614	1.75e-20	RecName: Full=Non-reducing end alpha-L-arabinofuranosidase BoGH43B
THTET00000009441	-0.256271	1.19439	0.15955	no	-3.5375	11.6116	5e-05	yes	1.25696		5e-05	yes	-0.0977502	1.0701	0.60055	no	unitig_90|quiver	amdhd2	CE9			N	gi|82186144|sp|Q6P0U0.1|NAGA_DANRE	39.862	1.31e-91	RecName: Full=N-acetylglucosamine-6-phosphate deacetylase
THTET00000009080	-0.256057	1.19421	0.0967	no	2.1511		5e-05	yes	-0.395501	1.3154	0.0159	no	-0.0882617	1.06309	0.5852	no	unitig_90|quiver	cel1	AA9			Y	gi|2494341|sp|Q00023.1|CEL1_AGABI	35.039	1.11e-36	RecName: Full=Cellulose-growth-specific protein
THTET00000008234	-5.19521	36.6365	5e-05	yes	-4.09272	17.0621	0.0002	yes	-2.15583	4.45625	0.03445	no	-0.0774686	1.05516	0.866	no	unitig_87|quiver	beta_2	AA3_2			N	gi|42558858|sp|Q7MF12.1|BETA_VIBVY	30.609	3.28e-64	RecName: Full=Oxygen-dependent choline dehydrogenase
THTET00000008085	1.6832		5e-05	yes	1.92376		5e-05	yes	0.486352		0.04555	no	-0.0717638	1.051	0.744	no	unitig_87|quiver	mana	GH5_7			Y	gi|1239396170|sp|B2B3C0.1|MANA_PODAN	69.73	0	RecName: Full=Mannan endo-1,4-beta-mannosidase A
THTET00000003917	-3.936	15.3057	5e-05	yes	#NAME?		1	no	0		1	no	0		1	no	unitig_1|quiver	abr1	AA1_2			N	gi|1042851631|sp|Q4WZB4.2|ABR1_ASPFU	39.962	4.08e-125	RecName: Full=Multicopper oxidase abr1
THTET00000000823	-1.98544	3.95983	5e-05	yes	-0.563803	1.47816	0.01235	yes	-0.709499	1.63524	0.00015	yes	0.0183044		0.91565	no	unitig_0|quiver	cts1_2	GH18			N	gi|115515972|sp|Q1E3R8.1|CHI1_COCIM	54.872	1.69e-161	RecName: Full=Endochitinase 1
THTET00000000996	-1.31457	2.48728	0.0025	yes	-1.53281	2.89349	0.00115	yes	0.0941244		1	no	0.144722		1	no	unitig_0|quiver	mal1	GH13_40			N	gi|74625263|sp|Q9P6J3.1|MALT_SCHPO	51.127	0	RecName: Full=Alpha-glucosidase
THTET00000007602	2.42774		5e-05	yes	2.52408		0.0001	yes	-0.28896	1.22176	0.43545	no	0.172675		0.58645	no	unitig_87|quiver	pg1	GH28			Y	gi|2499715|sp|Q00446.1|PGLR1_COLLN	72.423	0	RecName: Full=Endopolygalacturonase 1
THTET00000006379	-3.73564	13.3211	5e-05	yes	-2.48831	5.6112	5e-05	yes	-0.172237	1.1268	0.6428	no	0.176751		0.59855	no	unitig_6|quiver	nbis_	GH43_24			Y	gi|254763368|sp|P42293.2|EABN2_BACSU	25.967	0.008	RecName: Full=Extracellular endo-alpha-(1->5)-L-arabinanase 2
THTET00000002287	-0.280292	1.21444	0.0599	no	-0.991351	1.98805	5e-05	yes	-0.016804	1.01172	0.91435	no	0.308356		0.0526	no	unitig_0|quiver	pmt1	GT39			N	gi|461956|sp|P33775.1|PMT1_YEAST	45.578	0	RecName: Full=Dolichyl-phosphate-mannose--protein mannosyltransferase 1
THTET00000009224	-1.64028	3.11726	0.00435	yes	-2.18179	4.53716	0.0024	yes	-3.11142	8.64233	5e-05	yes	0.352885		0.5295	no	unitig_90|quiver	bglm	GH3			N	gi|298351545|sp|A5ABF5.1|BGLM_ASPNC	48.375	0	RecName: Full=Probable beta-glucosidase M
THTET00000009821	-1.84469	3.59176	5e-05	yes	-1.95393	3.87428	5e-05	yes	0.19788		0.54345	no	0.417548		0.2315	no	unitig_92|quiver	pmt2	GT39			N	gi|74586781|sp|Q5ADM9.1|PMT2_CANAL	49.935	0	RecName: Full=Dolichyl-phosphate-mannose--protein mannosyltransferase 2
THTET00000002694	0.284257		0.25995	no	-0.685554	1.60832	0.0102	yes	1.41245		5e-05	yes	0.429831		0.17855	no	unitig_1|quiver	chs-3	GT2			N	gi|51854826|sp|P30588.2|CHS3_NEUCR	82.943	0	RecName: Full=Chitin synthase 3
THTET00000008869	-3.47207	11.0968	0.0098	yes	-2.46551	5.52322	0.1028	no	1.18157		0.49195	no	0.476188		0.64475	no	unitig_88|quiver	mnga	GT55			N	gi|28380092|sp|Q9UZC1.1|MPGS_PYRAB	34.975	4.71e-63	RecName: Full=Mannosyl-3-phosphoglycerate synthase
THTET00000006565	-0.123206	1.08915	0.4329	no	0.22643		0.2713	no	0.389895		0.0615	no	0.520411		0.00295	yes	unitig_6|quiver	nbis_	GT31			N	gi|145559453|sp|Q70JA7.3|CHSS3_HUMAN	24.138	1.54e-05	RecName: Full=Chondroitin sulfate synthase 3
THTET00000007941	-1.46189	2.75469	0.0042	yes	-1.69548	3.23885	0.0049	yes	0.587269		0.3172	no	0.635687		0.14335	no	unitig_87|quiver	lcc2	AA1_3			Y	gi|1338304414|sp|A0A067XMP0.2|PTAE_PESFW	51.078	0	RecName: Full=Oxidoreductase ptaE
THTET00000009103	-1.52905	2.88596	5e-05	yes	-1.67324	3.1893	5e-05	yes	-0.171946	1.12658	0.6107	no	0.668431		0.127	no	unitig_90|quiver	cel6c	GH6			Y	gi|803374851|sp|B2AE04.1|CEL6C_PODAN	73.3	0	RecName: Full=1,4-beta-D-glucan cellobiohydrolase CEL6C
THTET00000003455	-1.60982	3.05214	5e-05	yes	-1.79657	3.47393	5e-05	yes	-0.495252	1.40957	0.2565	no	0.673984		0.18335	no	unitig_1|quiver	gls2	GH31			Y	gi|74638865|sp|Q9US55.1|GLU2A_SCHPO	42.857	0	RecName: Full=Glucosidase 2 subunit alpha
THTET00000000860	1.287		5e-05	yes	1.13356		5e-05	yes	0.417654		0.0738	no	0.742417		0.00035	yes	unitig_0|quiver	agla	GH31			N	gi|3023267|sp|P56526.1|AGLU_ASPNG	59.317	0	RecName: Full=Alpha-glucosidase
THTET00000009069	-2.43426	5.40487	5e-05	yes	0.496486		0.0444	no	-1.25262	2.38274	5e-05	yes	0.788942		0.00015	yes	unitig_90|quiver	cdh-1_4	AA3_1	AA8		Y	gi|6831496|sp|Q01738.1|CDH_PHACH	40.202	2.04e-161	RecName: Full=Cellobiose dehydrogenase
THTET00000003186	-4.41667	21.3575	0.00085	yes	-1.70824	3.26762	0.1809	no	0.249181		0.8705	no	0.805779		0.4098	no	unitig_1|quiver	ktxa_2	GH18			N	gi|125727|sp|P09805.1|KTXA_KLULA	32.075	3.5e-43	RecName: Full=Killer toxin subunits alpha/beta
THTET00000006464	0.25438		0.08255	no	-0.937565	1.91529	5e-05	yes	0.259088		0.15435	no	0.876725		5e-05	yes	unitig_6|quiver	mns1b	GH47			Y	gi|121939500|sp|Q2ULB2.1|MNS1B_ASPOR	38.76	6.61e-36	RecName: Full=Mannosyl-oligosaccharide alpha-1,2-mannosidase 1B
THTET00000001404	0.127703		0.5721	no	-0.683323	1.60583	0.04805	no	-0.460805	1.37631	0.044	no	0.923233		5e-05	yes	unitig_0|quiver	btge	GH17			Y	gi|298351586|sp|A1C499.1|BTGE_ASPCL	42.086	4e-122	RecName: Full=Probable beta-glucosidase btgE
THTET00000001132	-1.86815	3.65064	5e-05	yes	-0.623856	1.54099	0.09925	no	-0.855703	1.80964	0.0034	yes	0.971214		0.0037	yes	unitig_0|quiver	bglb	GH3			N	gi|74598759|sp|Q5BFG8.1|BGLB_EMENI	44.431	0	RecName: Full=Beta-glucosidase B
THTET00000003238	-5.30401	39.5063	5e-05	yes	1.42606		5e-05	yes	-0.545045	1.45907	0.0116	yes	0.999638		5e-05	yes	unitig_1|quiver	eg	GH5_5			Y	gi|126302552|sp|P23044.2|GUN_ROBSP	74.271	0	RecName: Full=Endoglucanase 1
THTET00000000222	-4.17934	18.1179	5e-05	yes	-1.75711	3.3802	0.00115	yes	0.319689		1	no	1.01096		1	no	unitig_0|quiver	nbis_	GH43_30			Y	gi|298351513|sp|A1DKY5.1|ABNC_NEOFI	31.496	0.00058	RecName: Full=Probable arabinan endo-1,5-alpha-L-arabinosidase C
THTET00000008123	-1.04151	2.05838	5e-05	yes	-1.4757	2.78119	5e-05	yes	-0.109805	1.07908	0.6588	no	1.02198		0.0025	yes	unitig_87|quiver	alg9	GT22			N	gi|21542324|sp|Q9P7Q9.1|ALG9_SCHPO	38.968	9.33e-120	RecName: Full=Alpha-1,2-mannosyltransferase alg9
THTET00000010003	-1.3892	2.61933	5e-05	yes	-0.843601	1.79452	0.0171	yes	-0.213253	1.1593	0.42965	no	1.03662		0.0756	no	unitig_92|quiver	ymr196w	GH0			N	gi|2497183|sp|Q04336.1|YM54_YEAST	55.302	0	RecName: Full=Uncharacterized protein YMR196W
THTET00000005829	0.68992		0.00445	yes	1.6622		5e-05	yes	1.52899		5e-05	yes	1.05363		5e-05	yes	unitig_6|quiver	bglx	GH3			Y	gi|20141276|sp|Q56078.2|BGLX_SALTY	34.932	1.96e-130	RecName: Full=Periplasmic beta-glucosidase
THTET00000005665	0.853092		5e-05	yes	0.897546		0.01245	yes	0.56995		0.00275	yes	1.0609		5e-05	yes	unitig_4|quiver	vaoa	AA4			N	gi|3024813|sp|P56216.1|VAOX_PENSI	45.027	5.68e-176	RecName: Full=Vanillyl-alcohol oxidase
THTET00000007671	1.00741		5e-05	yes	1.38468		5e-05	yes	-1.46591	2.76238	5e-05	yes	1.10418		5e-05	yes	unitig_87|quiver	exg1_4	GH55			Y	gi|1352399|sp|P49426.1|EXG1_COCCA	38.808	6.85e-147	RecName: Full=Glucan 1,3-beta-glucosidase
THTET00000007374	-1.94885	3.86067	0.0033	yes	-2.63095	6.19434	0.0033	yes	-1.58513	3.00035	0.02145	no	1.20266		0.17925	no	unitig_12|quiver	fet3	AA1_2			N	gi|62901519|sp|Q96WT3.1|FET3_CANGA	45.47	0	RecName: Full=Iron transport multicopper oxidase FET3
THTET00000009052	-0.797254	1.73779	5e-05	yes	-1.20373	2.30334	5e-05	yes	-0.534891	1.44883	0.00215	yes	1.20312		5e-05	yes	unitig_90|quiver	och1_2	GT32			N	gi|24638073|sp|Q9UTR6.2|OCH1_SCHPO	32.941	1.78e-14	RecName: Full=Initiation-specific alpha-1,6-mannosyltransferase
THTET00000002410	-1.59501	3.02097	5e-05	yes	-1.69198	3.231	5e-05	yes	-0.972268	1.96192	0.002	yes	1.20491		0.09285	no	unitig_0|quiver	arb_12	GH16			Y	gi|961512591|sp|D4B4J2.2|CRH12_ARTBC	45.988	2.41e-89	RecName: Full=Probable extracellular glycosidase ARB_03382
THTET00000000254	-0.814649	1.75887	5e-05	yes	-0.403358	1.32258	0.0395	no	-0.751615	1.68368	5e-05	yes	1.27654		5e-05	yes	unitig_0|quiver	man9	GH2			N	gi|597501007|sp|I2C092.1|MANBB_THIHE	83.977	0	RecName: Full=Beta-mannosidase B
THTET00000009350	-0.650371	1.56957	0.00045	yes	-1.13707	2.19934	5e-05	yes	0.0307499		0.87375	no	1.29086		5e-05	yes	unitig_90|quiver	arb_07629	GH92			N	gi|961512534|sp|D4ATR3.1|A7629_ARTBC	50.706	0	RecName: Full=Uncharacterized secreted glycosidase ARB_07629
THTET00000000962	0.560853		0.14505	no	0.138424		0.7253	no	0.753038		0.08115	no	1.30359		0.0003	yes	unitig_0|quiver	nbis_	AA11			N	NA	NA	NA	NA
THTET00000002388	1.10573		5e-05	yes	-0.245379	1.1854	0.3298	no	-0.495293	1.40961	0.00445	yes	1.32127		5e-05	yes	unitig_0|quiver	nbis_	GT0			N	gi|33301413|sp|Q9A6R5.1|OPGH_CAUCR	22.194	0.000128	RecName: Full=Glucans biosynthesis glucosyltransferase H [Caulobacter vibrioides CB15]
THTET00000009541	2.82572		5e-05	yes	2.66067		5e-05	yes	2.46424		5e-05	yes	1.3509		0.0002	yes	unitig_90|quiver	arb_27	GH81			N	gi|961512567|sp|D4AZ24.1|ENG1_ARTBC	55.028	0	RecName: Full=Probable endo-1,3(4)-beta-glucanase ARB_01444
THTET00000002436	-0.0525867	1.03712	0.79585	no	-0.462156	1.3776	0.1084	no	0.0471045		0.8711	no	1.37042		5e-05	yes	unitig_0|quiver	bgle	GH3			N	gi|74667466|sp|Q4WD56.1|BGLE_ASPFU	59.432	0	RecName: Full=Probable beta-glucosidase E
THTET00000007738	-1.08242	2.11759	5e-05	yes	-1.30889	2.47751	5e-05	yes	0.0255156		0.88185	no	1.37687		5e-05	yes	unitig_87|quiver	rhgb	GH28			Y	gi|296439760|sp|B0Y0Q3.1|RHGB_ASPFC	62.069	0	RecName: Full=Probable rhamnogalacturonase B
THTET00000008392	0.463947		0.0047	yes	0.90618		0.0005	yes	-0.125839	1.09114	0.4651	no	1.48131		5e-05	yes	unitig_87|quiver	gpt1	GT24			Y	gi|15214322|sp|Q09140.2|UGGG_SCHPO	33.748	0	RecName: Full=UDP-glucose:glycoprotein glucosyltransferase
THTET00000000889	0.522271		0.0011	yes	0.282875		0.15545	no	-0.326308	1.2538	0.0646	no	1.50418		5e-05	yes	unitig_0|quiver	alta7	AA6			N	gi|1168402|sp|P42058.1|ALTA7_ALTAL	65.842	8.93e-95	RecName: Full=Minor allergen Alt a 7
THTET00000007949	0.280149		1	no	-2.0914	4.26161	0.00045	yes	-2.14207	4.41395	0.00085	yes	1.51463		1	no	unitig_87|quiver	mnda	GH2			N	gi|121804589|sp|Q2UN00.1|MANBA_ASPOR	51.371	0	RecName: Full=Beta-mannosidase A
THTET00000006017	-0.37668	1.29835	0.0198	yes	0.0603033		0.7858	no	-0.911034	1.88039	5e-05	yes	1.57367		5e-05	yes	unitig_6|quiver	ncu09425	GH94			N	gi|74628522|sp|Q7S0S2.1|CELAP_NEUCR	79.576	0	RecName: Full=Cellobionic acid phosphorylase
THTET00000009600	3.05091		0.00585	yes	3.18066		0.0049	yes	1.40175		0.0107	yes	1.60392		0.00995	yes	unitig_92|quiver	sdh_2	AA3_2			N	gi|1209747835|sp|A0A142PTM2.1|CITC_MONPU	32.385	2.94e-79	RecName: Full=Dehydrogenase mpl7
THTET00000007085	-1.72288	3.30095	5e-05	yes	-1.98174	3.94969	5e-05	yes	-1.06381	2.09044	5e-05	yes	1.64365		5e-05	yes	unitig_11|quiver	dcw1_2	GH76			Y	gi|549674|sp|P36091.1|DCW1_YEAST	35.794	1.34e-83	RecName: Full=Mannan endo-1,6-alpha-mannosidase DCW1
THTET00000009442	0.345226		0.18735	no	-1.04203	2.05912	0.0622	no	0.102611		0.7101	no	1.70016		0.0001	yes	unitig_90|quiver	nagz	GH3			N	gi|732403|sp|P40406.1|NAGZ_BACSU	26.072	2.67e-40	RecName: Full=Beta-hexosaminidase
THTET00000000865	0.163208		0.4109	no	0.22116		0.3719	no	1.29389		5e-05	yes	1.70154		5e-05	yes	unitig_0|quiver	cesa	CE3			Y	gi|75420533|sp|Q9RLB8.1|CESA_RUMFL	29.004	3.14e-15	RecName: Full=Multidomain esterase
THTET00000005013	-2.00717	4.01993	5e-05	yes	-0.219861	1.16462	0.3071	no	-1.26775	2.40786	5e-05	yes	1.70323		5e-05	yes	unitig_3|quiver	beta_3	AA3			Y	gi|122056597|sp|Q4K4K7.1|BETA_PSEF5	30.66	6.27e-44	RecName: Full=Oxygen-dependent choline dehydrogenase
THTET00000009490	0.858217		5e-05	yes	1.04151		5e-05	yes	0.148085		0.41125	no	1.76446		5e-05	yes	unitig_90|quiver	cel61a_3	AA9			Y	gi|21263647|sp|O14405.1|GUN4_HYPJE	54.627	2.44e-117	RecName: Full=Endoglucanase-4
THTET00000001350	0.0297872		0.83285	no	0.00229248		0.99065	no	0.742449		5e-05	yes	1.79869		5e-05	yes	unitig_0|quiver	spac4h3.03c	GH15			N	gi|1723279|sp|Q10211.1|YAY3_SCHPO	47.773	0	RecName: Full=Uncharacterized protein C4H3.03c
THTET00000003105	-1.19722	2.29297	0.0122	yes	-1.42806	2.69085	0.0203	yes	-0.0377053	1.02648	0.94675	no	1.81234		0.1935	no	unitig_1|quiver	e13b	GH64	GH64		N	gi|119005|sp|P22222.1|E13B_CELCE	25.43	2.15e-11	RecName: Full=Glucan endo-1,3-beta-glucosidase
THTET00000006007	-1.27877	2.42632	5e-05	yes	-0.789012	1.72789	0.0501	no	0.561082		0.0398	no	1.8715		0.02515	yes	unitig_6|quiver	rebg	GT1			N	gi|1338308329|sp|E7CQW6.1|UGTA1_STABO	30.737	1.43e-60	RecName: Full=UDP-glucosyltransferase A1
THTET00000002338	0.588441		0.1775	no	0.826449		0.0931	no	1.7363		0.0058	yes	1.93521		0.00795	yes	unitig_0|quiver	aox1_2	AA3_3			N	gi|597439598|sp|P04842.2|ALOX1_PICPG	68.196	0	RecName: Full=Alcohol oxidase 1
THTET00000000708	1.00159		5e-05	yes	-0.247388	1.18706	0.2037	no	-1.09883	2.14181	5e-05	yes	1.98775		5e-05	yes	unitig_0|quiver	arb_07867_2	AA5_1			Y	gi|961512705|sp|D4AUF1.1|WSCD1_ARTBC	52.124	0	RecName: Full=WSC domain-containing protein ARB_07867
THTET00000004001	-0.793486	1.73326	5e-05	yes	-0.157019	1.11498	0.5401	no	0.974697		0.00015	yes	2.08779		5e-05	yes	unitig_2|quiver	nbis_	GH16			Y	gi|27805478|sp|O14412.1|GUB_ORPSP	24.405	0.006	RecName: Full=Beta-glucanase
THTET00000008845	-0.0041196	1.00286	0.97965	no	-0.0848411	1.06057	0.6634	no	0.859454		5e-05	yes	2.14068		5e-05	yes	unitig_88|quiver	omh4	GT15			N	gi|408360171|sp|O94565.2|OMH4_SCHPO	46.19	4.15e-134	RecName: Full=O-glycoside alpha-1,2-mannosyltransferase homolog 4
THTET00000009484	1.073		5e-05	yes	0.799611		0.00195	yes	1.0667		5e-05	yes	2.26276		5e-05	yes	unitig_90|quiver	lac4	GH2			N	gi|399112|sp|P00723.2|BGAL_KLULA	44.553	2.64e-167	RecName: Full=Beta-galactosidase
THTET00000009019	0		1	no	-0.964378	1.95122	0.02295	yes	-0.38959	1.31002	0.2574	no	2.30335		5e-05	yes	unitig_90|quiver	yesr	GH105			N	gi|81555896|sp|O31521.1|URHG1_BACSU	27.829	3.29e-34	RecName: Full=Unsaturated rhamnogalacturonyl hydrolase YesR
THTET00000006036	0.923983		0.00035	yes	0.98998		0.0009	yes	0.532119		0.0334	no	2.40786		5e-05	yes	unitig_6|quiver	chi1	GH18			N	gi|116305|sp|P29025.1|CHI1_RHINI	28.384	3.73e-07	RecName: Full=Chitinase 1
THTET00000004743	0.504683		0.18345	no	0.0737663		0.8786	no	-1.11479	2.16563	0.0048	yes	2.4345		0.00105	yes	unitig_2|quiver	nbis_	GH93			N	gi|81678377|sp|Q5QY37.1|RECF_IDILO	30.263	0.98	RecName: Full=DNA replication and repair protein RecF
THTET00000008344	-0.171137	1.12595	0.39215	no	0.0597624		0.821	no	0.640863		0.005	yes	2.4539		5e-05	yes	unitig_87|quiver	apg-12	GT1			N	gi|73619414|sp|Q7S1I0.1|ATG26_NEUCR	63.214	0	RecName: Full=Sterol 3-beta-glucosyltransferase
THTET00000006774	-0.461235	1.37672	0.0741	no	-0.143343	1.10446	0.6766	no	0.0960683		0.7294	no	2.4704		0.00455	yes	unitig_11|quiver	nbis_	GT0			N	NA	NA	NA	NA
THTET00000009662	0.293944		0.23955	no	-0.249031	1.18841	0.4064	no	-0.362576	1.28572	0.2426	no	2.65471		0.00055	yes	unitig_92|quiver	ktr5	GT15			N	gi|1730718|sp|P53966.1|KTR5_YEAST	35.253	1.66e-85	RecName: Full=Probable mannosyltransferase KTR5
THTET00000009331	1.45596		5e-05	yes	2.53004		5e-05	yes	0.648035		0.0001	yes	2.76892		5e-05	yes	unitig_90|quiver	exg1_5	GH55			N	gi|1352399|sp|P49426.1|EXG1_COCCA	49.275	0	RecName: Full=Glucan 1,3-beta-glucosidase
THTET00000005901	-0.179225	1.13228	0.2564	no	-0.430098	1.34733	0.04055	no	-0.406723	1.32567	0.0176	no	2.78373		5e-05	yes	unitig_6|quiver	cxt1	GT90			N	gi|74682361|sp|Q5K8R6.1|CXT1_CRYNJ	24.66	4.11e-35	RecName: Full=Beta-1,2-xylosyltransferase 1
THTET00000005876	2.25154		0.026	yes	0.532582		0.32495	no	0.253254		0.45535	no	2.81388		0.00735	yes	unitig_6|quiver	abfc	GH51			N	gi|121743194|sp|Q0D1I6.1|ABFC_ASPTN	68.75	0	RecName: Full=Probable alpha-L-arabinofuranosidase C
THTET00000003184	0.960633		5e-05	yes	1.00031		5e-05	yes	-0.198609	1.14759	0.2166	no	2.8737		5e-05	yes	unitig_1|quiver	nbis_	GT31			N	gi|81868592|sp|Q9JJ06.1|C1GLT_MOUSE	30.172	1.26e-05	RecName: Full=Glycoprotein-N-acetylgalactosamine 3-beta-galactosyltransferase 1
THTET00000001042	-1.01722	2.02402	5e-05	yes	-1.00406	2.00564	0.00215	yes	0.236658		0.42195	no	2.9244		0.01765	yes	unitig_0|quiver	gdb1	GH13_25			N	gi|59799525|sp|Q06625.1|GDE_YEAST	48.412	0	RecName: Full=Glycogen debranching enzyme
THTET00000008704	0.78343		0.1346	no	0.683303		0.2935	no	0.877938		0.082	no	2.95233		5e-05	yes	unitig_88|quiver	gpi10	GT22			N	gi|110808258|sp|Q4IB63.1|GPI10_GIBZE	52.139	0	RecName: Full=GPI mannosyltransferase 3
THTET00000005460	0.0845843		0.57155	no	-0.0484099	1.03412	0.7928	no	0.837061		5e-05	yes	2.96604		5e-05	yes	unitig_4|quiver	chs6	GT2			N	gi|122065156|sp|O13395.2|CHS6_USTMA	47.619	0	RecName: Full=Chitin synthase 6
THTET00000008109	2.37497		5e-05	yes	-1.7996	3.48124	5e-05	yes	-0.742734	1.67334	0.0005	yes	2.97186		5e-05	yes	unitig_87|quiver	csn	GH75			N	gi|74666748|sp|Q4WB37.1|CSN_ASPFU	48.374	5.07e-64	RecName: Full=Endo-chitosanase
THTET00000009549	1.21677		0.0008	yes	-0.127567	1.09245	0.69525	no	1.82973		5e-05	yes	3.06734		0.00025	yes	unitig_90|quiver	mns1b_2	GH47			Y	gi|298351794|sp|A2QAS2.1|MNS1B_ASPNC	56.751	0	RecName: Full=Probable mannosyl-oligosaccharide alpha-1,2-mannosidase 1B
THTET00000000612	-1.47404	2.77799	5e-05	yes	-2.0694	4.19712	5e-05	yes	-0.26433	1.20108	0.47915	no	3.17231		0.0107	yes	unitig_0|quiver	mug157_2	GH125			N	gi|1723558|sp|Q10449.1|MU157_SCHPO	36.637	6.94e-103	RecName: Full=Meiotically up-regulated gene 157 protein
THTET00000004634	-0.156028	1.11422	0.57325	no	3.98514		5e-05	yes	-1.20452	2.30461	0.0001	yes	3.25639		5e-05	yes	unitig_2|quiver	cel61a_2	AA9			Y	gi|21263647|sp|O14405.1|GUN4_HYPJE	41.758	2.85e-62	RecName: Full=Endoglucanase-4
THTET00000003035	0.223455		0.1989	no	-0.0252383	1.01765	0.90305	no	0.908889		5e-05	yes	3.26757		5e-05	yes	unitig_1|quiver	arb_29	GH72			Y	gi|952543449|sp|D4ATC3.1|GAS1_ARTBC	48.79	0	RecName: Full=1,3-beta-glucanosyltransferase ARB_07487
THTET00000009612	1.99631		5e-05	yes	2.7		5e-05	yes	-0.258413	1.19616	0.2758	no	3.27127		5e-05	yes	unitig_92|quiver	rebg_2	GT1			N	gi|1338308337|sp|E9L011.1|UGTB1_STABO	30.043	4.49e-54	RecName: Full=UDP-glucosyltransferase B1
THTET00000000326	0.0402301		0.84175	no	0.0312196		0.90545	no	-0.561136	1.47543	0.01445	no	3.29261		5e-05	yes	unitig_0|quiver	ncu00937	GH79			N	gi|74618388|sp|Q7SFB0.1|GUS79_NEUCR	64.587	0	RecName: Full=Beta-glucuronidase
THTET00000008253	0.140527		0.3967	no	0.886538		5e-05	yes	0.524407		0.00405	yes	3.32849		5e-05	yes	unitig_87|quiver	pgad	CE8	GH28		Y	gi|294958171|sp|Q2UT29.2|PGLRD_ASPOR	54.115	1.9e-128	RecName: Full=Probable endopolygalacturonase D
THTET00000008821	0.726907		0.1592	no	1.75544		0.03305	no	0.0112316		0.9714	no	3.38764		5e-05	yes	unitig_88|quiver	ycr2	GH31			N	gi|1723371|sp|Q01336.1|YCR2_ESCVU	56.522	0	RecName: Full=Uncharacterized family 31 glucosidase ORF2
THTET00000006405	0.532605		0.00085	yes	-0.5611	1.47539	0.0063	yes	-0.184345	1.1363	0.27515	no	3.39097		5e-05	yes	unitig_6|quiver	bgla	GH3			Y	gi|121740345|sp|Q0CTD7.1|BGLA_ASPTN	50.227	0	RecName: Full=Probable beta-glucosidase A
THTET00000006691	1.6494		5e-05	yes	1.63146		5e-05	yes	0.807667		5e-05	yes	3.41436		5e-05	yes	unitig_7|quiver	agl2	GH31			N	gi|14423647|sp|Q9F234.1|AGL2_BACTQ	25.79	2.26e-52	RecName: Full=Alpha-glucosidase 2
THTET00000009741	0.413133		0.01685	yes	0.693935		0.00225	yes	0.022866		0.89735	no	3.48008		5e-05	yes	unitig_92|quiver	cxt1_5	GT90			N	gi|74682361|sp|Q5K8R6.1|CXT1_CRYNJ	25.36	5.58e-16	RecName: Full=Beta-1,2-xylosyltransferase 1
THTET00000009042	2.70178		5e-05	yes	1.26457		5e-05	yes	0.172787		0.3598	no	3.48693		5e-05	yes	unitig_90|quiver	cmt1_3	GT69			N	gi|52782778|sp|Q6U1Z4.1|CMT1_CRYNJ	30.726	3.59e-36	RecName: Full=Alpha-1,3-mannosyltransferase CMT1
THTET00000003162	0.56214		0.0368	no	-0.0138192	1.00962	0.97275	no	-0.189638	1.14048	0.5227	no	3.48946		0.0019	yes	unitig_1|quiver	mgg	GT21			N	gi|961512515|sp|G4MS28.1|CEGT_MAGO7	56.262	0	RecName: Full=Ceramide glucosyltransferase
THTET00000002651	0.455452		0.0205	yes	0.424256		0.0746	no	0.180364		0.35945	no	3.55052		5e-05	yes	unitig_1|quiver	dcw1_6	GH76			Y	gi|549674|sp|P36091.1|DCW1_YEAST	44.186	2.16e-120	RecName: Full=Mannan endo-1,6-alpha-mannosidase DCW1
THTET00000000298	1.20067		0.00175	yes	0.892379		0.0654	no	0.499537		0.23325	no	3.56971		5e-05	yes	unitig_0|quiver	nbis_	GH76			N	NA	NA	NA	NA
THTET00000004342	1.46094		5e-05	yes	2.93701		5e-05	yes	0.702468		0.00115	yes	3.62688		5e-05	yes	unitig_2|quiver	bgla_2	GH3			Y	gi|296439517|sp|B8NRX2.1|BGLA_ASPFN	61.893	0	RecName: Full=Probable beta-glucosidase A
THTET00000007108	0.427521		0.43925	no	1.63293		0.0355	no	0.417081		0.5233	no	3.70447		5e-05	yes	unitig_11|quiver	mgta	GT4			N	gi|614093038|sp|P9WMY4.1|MGTA_MYCTO	31.714	2.13e-33	RecName: Full=GDP-mannose-dependent alpha-mannosyltransferase
THTET00000005927	4.55006		5e-05	yes	0.869362		0.0003	yes	1.96507		5e-05	yes	3.74648		5e-05	yes	unitig_6|quiver	lac1	AA1_3			Y	gi|74691506|sp|Q70KY3.1|LAC1_MELAO	70.541	0	RecName: Full=Laccase-1
THTET00000009795	1.25744		5e-05	yes	1.76265		5e-05	yes	0.189232		0.24145	no	3.88004		5e-05	yes	unitig_92|quiver	gel2	GH72			Y	gi|229890268|sp|B0Y8H9.1|GEL2_ASPFC	53.846	3.15e-158	RecName: Full=1,3-beta-glucanosyltransferase gel2
THTET00000006568	0.546286		5e-05	yes	0.101003		0.57125	no	-0.167922	1.12344	0.27655	no	4.0272		5e-05	yes	unitig_6|quiver	dcw1_5	GH76			Y	gi|549674|sp|P36091.1|DCW1_YEAST	44.244	1.52e-112	RecName: Full=Mannan endo-1,6-alpha-mannosidase DCW1
THTET00000008080	3.46047		0.008	yes	4.86719		0.049	no	5.20283		0.06715	no	4.05737		0.0001	yes	unitig_87|quiver	laca_2	GH35			N	gi|121801672|sp|Q2UCU3.1|BGALA_ASPOR	61.191	0	RecName: Full=Probable beta-galactosidase A
THTET00000007143	3.64537		5e-05	yes	4.53997		5e-05	yes	3.53637		5e-05	yes	4.37143		5e-05	yes	unitig_11|quiver	chit33	GH18			Y	gi|74627312|sp|Q12713.1|CHI33_TRIHA	56.463	1.16e-111	RecName: Full=Endochitinase 33
THTET00000007951	4.89712		0.0049	yes	5.88694		0.03335	no	2.12996		0.0033	yes	4.5928		0.00495	yes	unitig_87|quiver	bgla_3	GH16			Y	gi|1170129|sp|P45798.1|GUB_RHOMR	27.481	1.81e-13	RecName: Full=Beta-glucanase
THTET00000009077	0.961521		0.03825	no	1.92243		0.1696	no	-0.686638	1.60953	5e-05	yes	4.75342		5e-05	yes	unitig_90|quiver	gla-1	GH15	CBM20		N	gi|30316352|sp|P14804.3|AMYG_NEUCR	65.506	0	RecName: Full=Glucoamylase
THTET00000006053	5.36571		5e-05	yes	2.64464		5e-05	yes	4.84893		5e-05	yes	4.95331		5e-05	yes	unitig_6|quiver	agdc	GH31			Y	gi|74672124|sp|Q4WRH9.1|AGDC_ASPFU	52.113	0	RecName: Full=Probable alpha/beta-glucosidase agdC
THTET00000008899	0.385797		0.0153	yes	1.26545		5e-05	yes	-0.405142	1.32422	0.0257	no	5.11248		5e-05	yes	unitig_88|quiver	katg	AA2			N	gi|121787226|sp|Q2H7U1.1|KATG_CHAGB	85.56	0	RecName: Full=Catalase-peroxidase
THTET00000002720	2.24384		0.0001	yes	2.62792		0.01465	yes	-0.188623	1.13968	0.34795	no	5.59038		5e-05	yes	unitig_1|quiver	bglm_2	GH3			N	gi|298351546|sp|A1D122.1|BGLM_NEOFI	59.481	0	RecName: Full=Probable beta-glucosidase M
THTET00000006210	2.42843		5e-05	yes	3.13297		5e-05	yes	0.613128		0.0073	yes	5.67545		5e-05	yes	unitig_6|quiver	neg-1	GH30_3			Y	gi|59799885|sp|Q7M4T0.2|NEG1_NEUCR	69.665	0	RecName: Full=Endo-1,6-beta-D-glucanase
THTET00000006117	3.6694		5e-05	yes	inf		5e-05	yes	-0.605105	1.52109	0.0272	no	5.70295		0.01215	yes	unitig_6|quiver	cel12a_2	GH12			Y	gi|803374843|sp|G4NAZ1.1|CE12A_MAGO7	57.769	1.84e-102	RecName: Full=Endoglucanase cel12A
THTET00000007017	2.47758		5e-05	yes	1.27854		0.0236	yes	0.454973		0.0725	no	5.79302		0.01605	yes	unitig_11|quiver	arb_07629_2	GH92			Y	gi|961512534|sp|D4ATR3.1|A7629_ARTBC	53.962	0	RecName: Full=Uncharacterized secreted glycosidase ARB_07629
THTET00000009201	3.29323		5e-05	yes	2.80061		5e-05	yes	1.58776		0.0007	yes	5.96377		0.00275	yes	unitig_90|quiver	mndb	GH2			N	gi|298351836|sp|Q5B7W2.2|MANBB_EMENI	46.652	0	RecName: Full=Beta-mannosidase B
THTET00000005102	1.48368		5e-05	yes	2.65655		5e-05	yes	1.23322		5e-05	yes	6.14979		5e-05	yes	unitig_3|quiver	exg1_2	GH55			Y	gi|1352399|sp|P49426.1|EXG1_COCCA	46.073	0	RecName: Full=Glucan 1,3-beta-glucosidase
THTET00000007745	5.69748		5e-05	yes	6.90326		5e-05	yes	-0.0606834	1.04296	0.70295	no	8.11933		5e-05	yes	unitig_87|quiver	dcw1_3	GH76			Y	gi|549674|sp|P36091.1|DCW1_YEAST	44.766	1.25e-119	RecName: Full=Mannan endo-1,6-alpha-mannosidase DCW1
THTET00000008222	1.36118		0.0687	no	4.95527		0.1419	no	-0.0375671	1.02638	0.96065	no	inf		5e-05	yes	unitig_87|quiver	xlnd	GH3			Y	gi|292495290|sp|A1DJS5.1|XYND_NEOFI	52.124	0	RecName: Full=Probable exo-1,4-beta-xylosidase xlnD
THTET00000000702	-1.36037	2.56751	0.00085	yes	#NAME?		1	no	0		1	no	#NAME?		1	no	unitig_0|quiver	lac2	AA1_3			N	gi|1018740248|sp|J9VQZ4.2|LAC2_CRYNH	34.039	8.85e-96	RecName: Full=Laccase-2
THTET00000004715	#NAME?		1	no	#NAME?		5e-05	yes	0		1	no	#NAME?		1	no	unitig_2|quiver	nbis_	PL7_4			N	gi|3913044|sp|Q59478.1|ALYA_KLEPN	24	3.26e-05	RecName: Full=Alginate lyase
THTET00000003025	#NAME?		5e-05	yes	#NAME?		1	no	#NAME?		1	no	#NAME?		1	no	unitig_1|quiver	yvdp	AA7			Y	gi|81555736|sp|O06997.1|YVDP_BACSU	27.332	8.69e-29	RecName: Full=Uncharacterized FAD-linked oxidoreductase YvdP
THTET00000003024	#NAME?		1	no	#NAME?		5e-05	yes	#NAME?		1	no	#NAME?		1	no	unitig_1|quiver	xyl5	GH10			Y	gi|74663936|sp|Q8J1Y4.1|XYN5_MAGGR	58.457	8.58e-135	RecName: Full=Endo-1,4-beta-xylanase 5
